# Supplementary material for: Hollow Co nanoparticle/carbon nanotube composite foam for efficient electrocatalytic hydrogen evolution
Source: Royal Society of Chemistry journal article supplement (doi:10.1039/d2nj04441b), 2022-01-01
Supplement: d2nj04441b1.pdf [file d2nj04441b1.pdf]

## Supporting Information

### Hollow Co nanoparticles/carbon nanotubes composite foam for electrocatalytic hydrogen evolution

Ziying Li<sup>a</sup>, Linlin Zang<sup>b</sup>, Qing Xu<sup>a</sup>, Fengtong Shen<sup>a</sup>, Jingzhen Wang<sup>a</sup>, Ying Zhang<sup>a</sup>, Yanhong Zhang<sup>a, \*</sup>, Liguao Sun<sup>a, \*</sup>

<sup>a</sup> School of Chemical Engineering and Materials, Heilongjiang University, Harbin 150080, P. R. China  
Tel: +86-152-4503-2548; +86-188-0046-6412

E-mail: sunliguo1975@163.com; zhangyanhong1996@163.com

<sup>b</sup> School of Environmental Science and Engineering, Southern University of Science and Technology, Shenzhen 518055, P. R. China

## 1. Experiments

### 1.1. Acidizing treatment of carbon nanotubes

In this work, carbon nanotubes were acidified and oxidized to enhance the oxygen-containing functional groups on the surface and so improve their dispersibility in water. 6 g MWCNTs are added to 600 mL of mixed strong acid solution with a volume ratio of H<sub>2</sub>SO<sub>4</sub> to HNO<sub>3</sub> of 3:1. after uniform mixing, the reaction system is heated to 60 °C and stirred and refluxed for 3 h to form carboxyl and hydroxyl groups on the surface, the mixture is cooled to room temperature[1]. Transfer to a beaker, dilute with deionized water while stirring, and then wash with vacuum filtration until the filtrate is neutral. Finally, the filter residue is ultrasonically dispersed in deionized water, where the acidified carbon is dispersed. The solid concentration of the aqueous dispersion of nanotubes (MWCNTs) is 30 mg mL<sup>-1</sup>.

### 1.2. Preparation of polystyrene microspheres

The polystyrene microspheres used in this experiment were prepared by soap-free emulsion polymerization. The following is a typical synthesis procedure: In a three-necked flask, combine 50mL monomer and 500 mL deionized water, then boil the solution while stirring (stirring speed 300 rpm) and heating to remove the air in the flask. The effect of oxygen on the reaction's free radicals. After 3 min of

refluxing, 0.5 g of initiator potassium persulfate powder was added, and the reaction was allowed to run for 3 h to produce a polystyrene mixed solution result. The combined solution was then centrifuged at high speed (10000 rpm) to yield polystyrene microspheres, which were subsequently rinsed with deionized water and dispersed in water many times. The resulting solution had a solid content of about 76.1 mg mL<sup>-1</sup>.

### **1.3. Materials Characterization**

The morphology and microstructure were observed by scanning electron microscopy (SEM, SIGMA500, ZEISS, Germany) and transmission electron microscope (TEM, JEM2100, JEOL, Japan). The elemental composition was investigated by energy-dispersive X-ray spectroscopy (EDS, Oxford X-Max 80). The crystal structure and phase compositions of the synthesized samples were analyzed using X-ray diffraction (XRD, SmartLab-9kW, RIGAKU, Japan) patterns. The functional groups and element compositions of the samples were determined by X-ray photoelectron spectroscopy (XPS, VG ESCALAB 250, Thermo Electron, UK). Raman spectroscopy (Raman, in Via, Renishaw, UK) were used to collect Raman.

## 2. Results and discussion

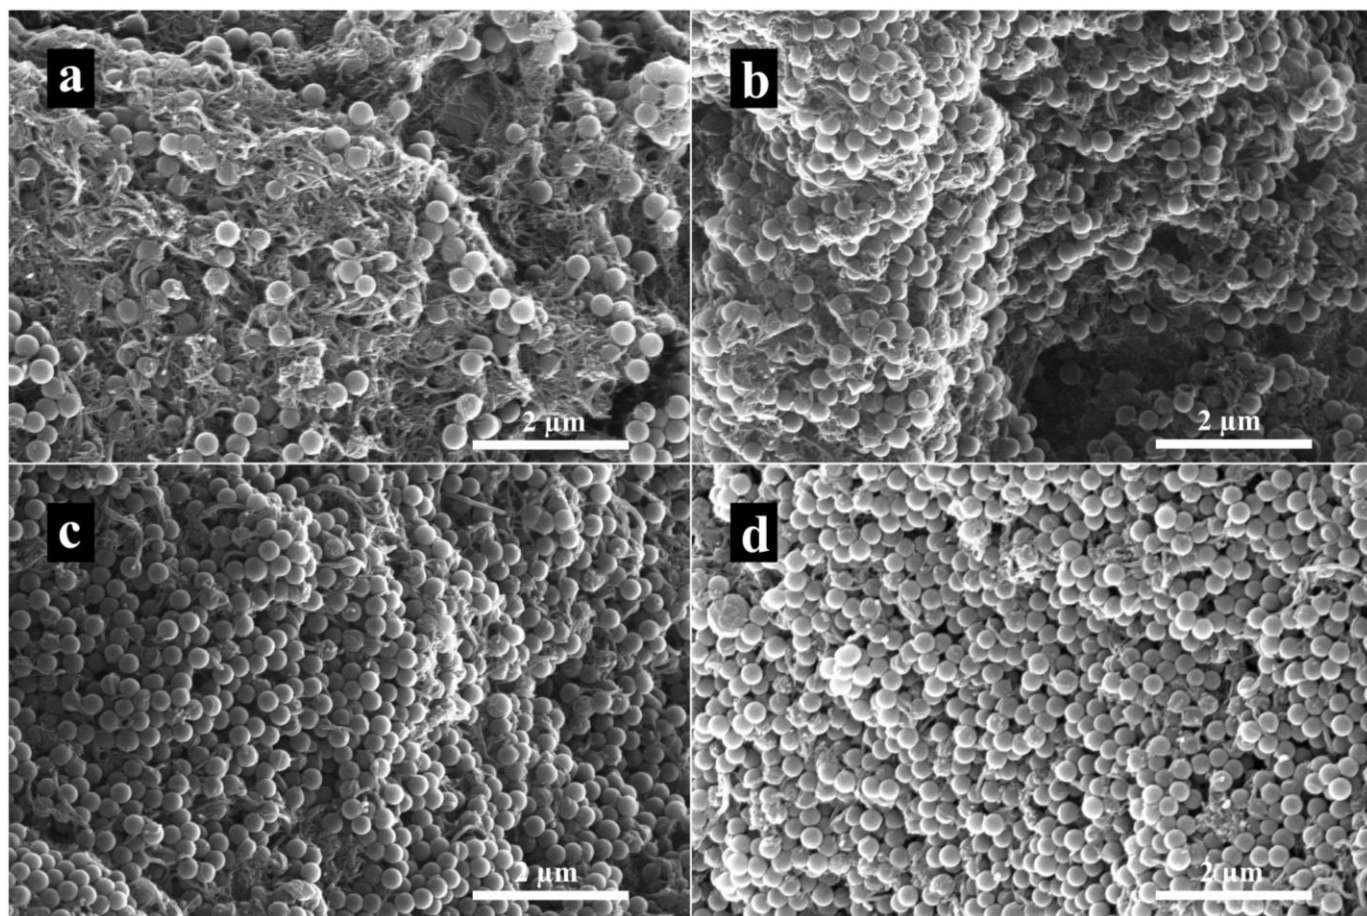

**Fig. S1.** (a-d) SEM images of Co/NCNT-25 composites with different adding contents of polystyrene microspheres (25, 50, 75, and 100 mg mL<sup>-1</sup>) before calcination.

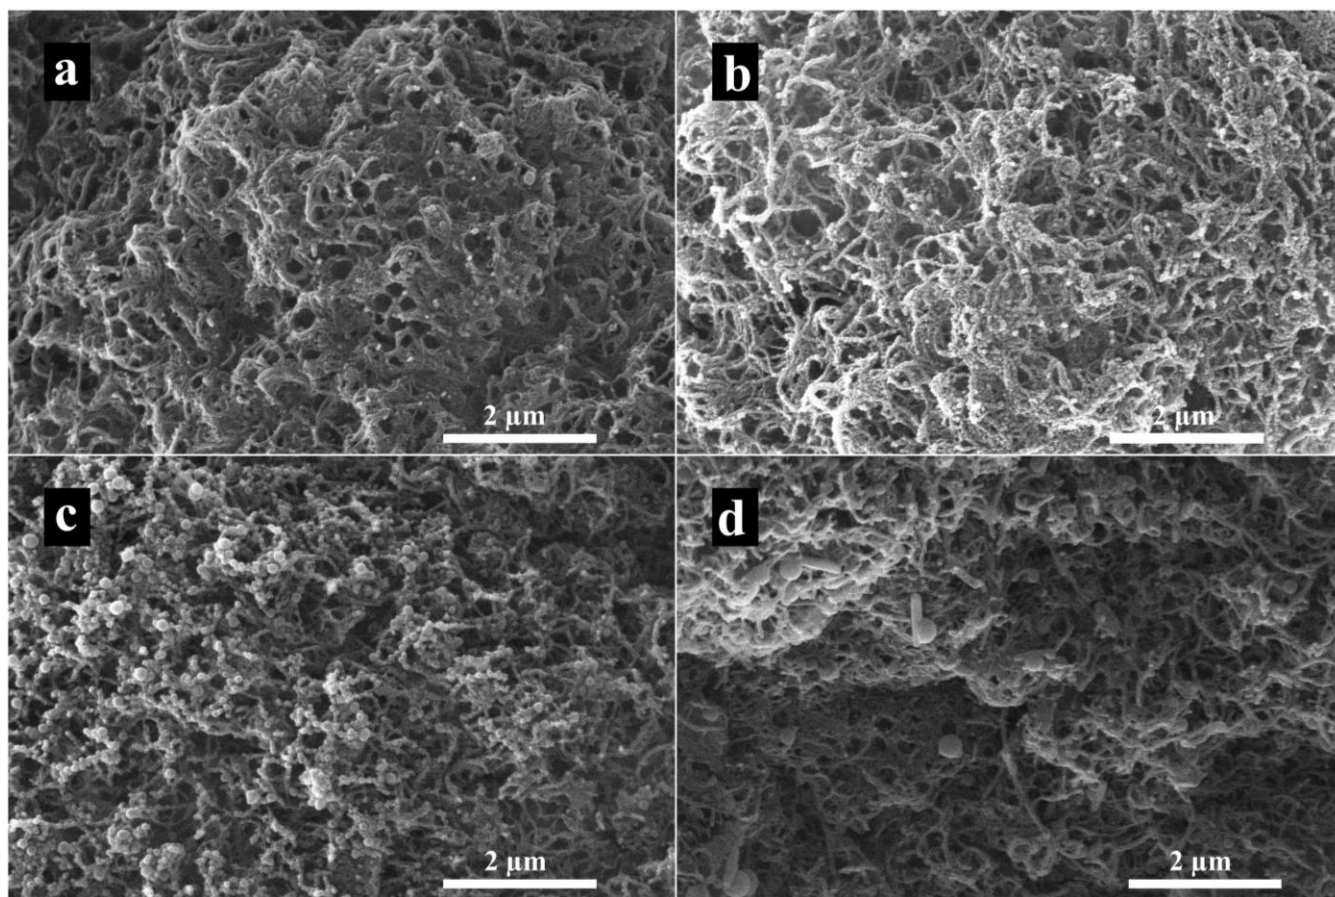

**Fig. S2.** (a-d) SEM images of Co/NCNT-25 composites with different adding contents of polystyrene microspheres (25, 50, 75, and 100 mg mL<sup>-1</sup>).

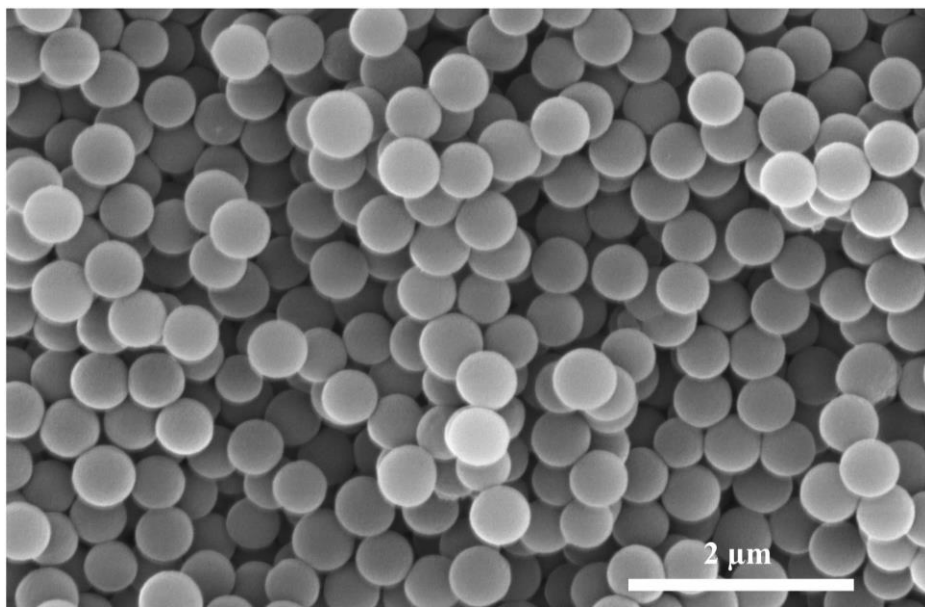

**Fig. S3.** SEM image of polystyrene microspheres.

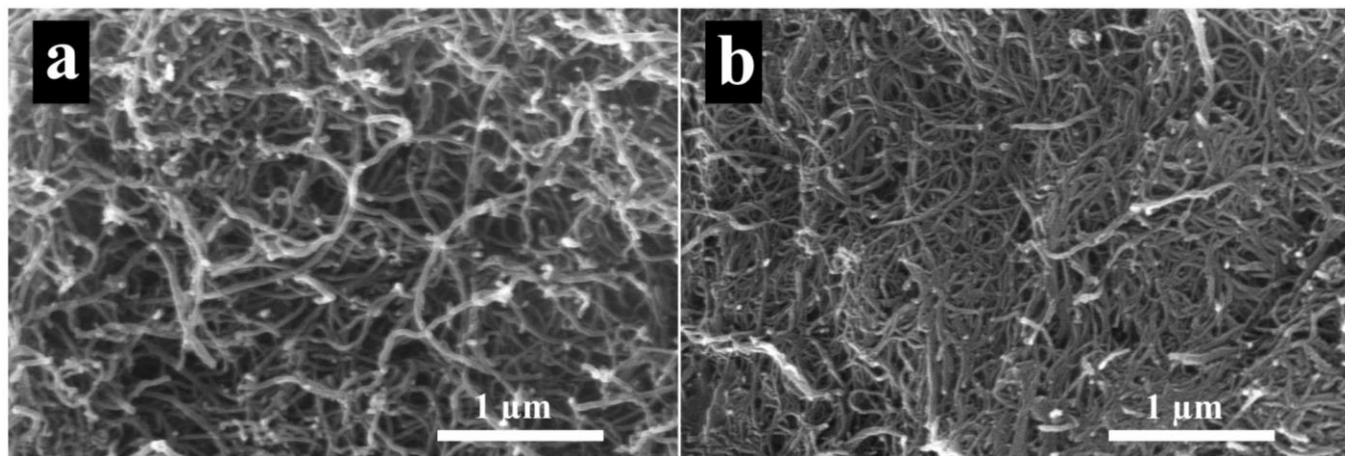

**Fig. S4.** (a, b) SEM images of raw CNTs and acid-treated CNTs

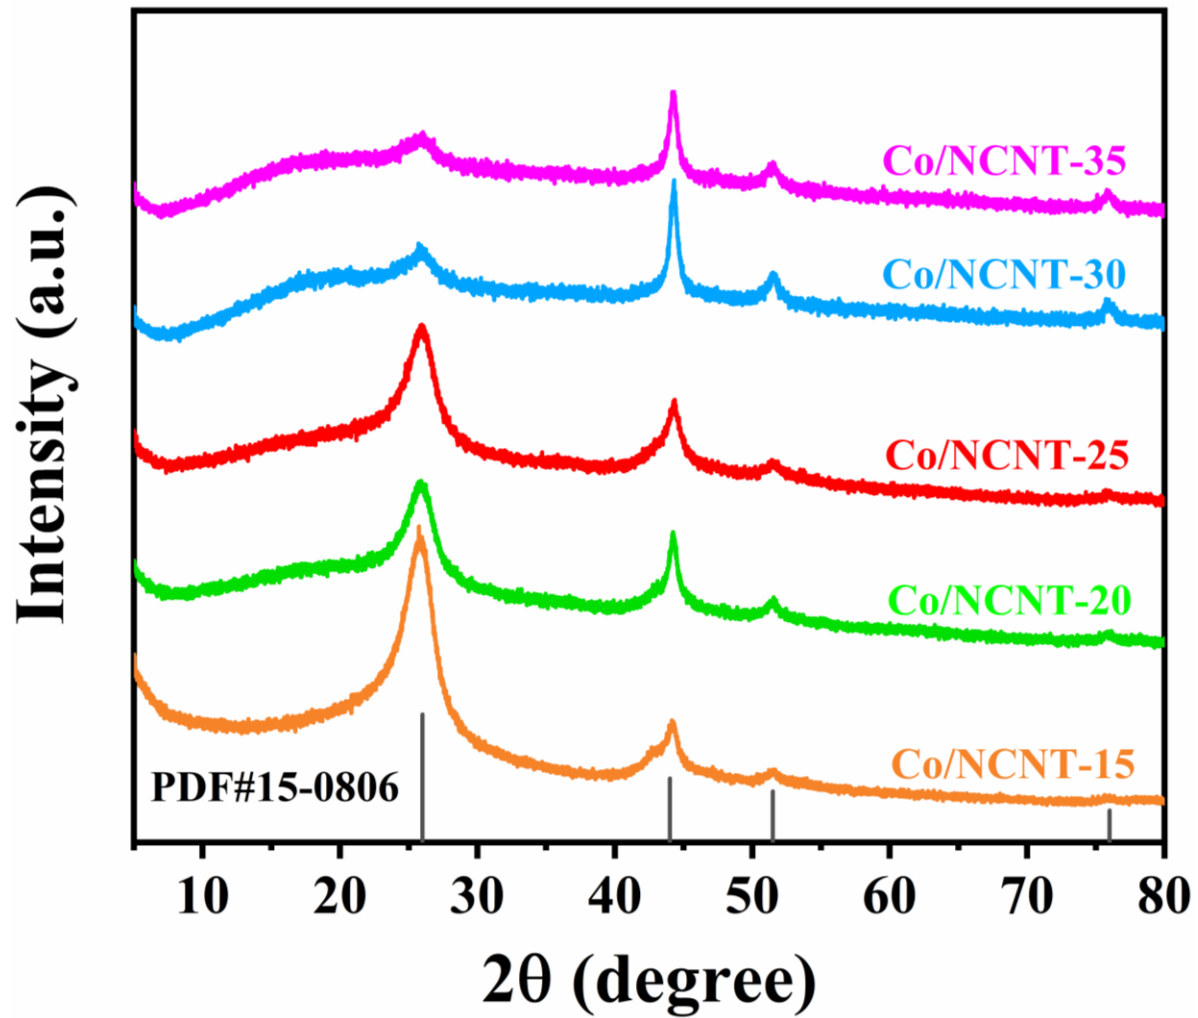

Fig. S5. XRD patterns of the Co/NCNT with different Co amounts.

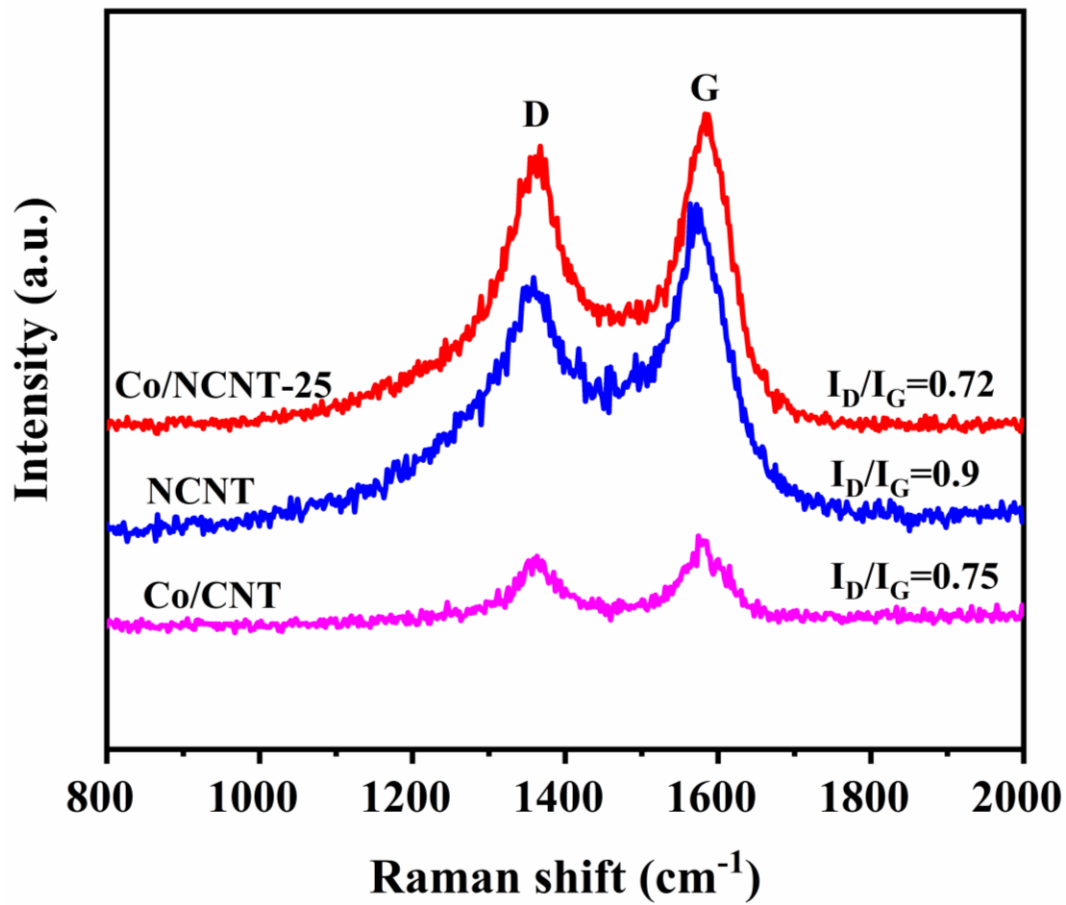

Fig. S6. Raman spectroscopy of the Co/NCNT-25 and NCNT and Co/CNT catalysts.

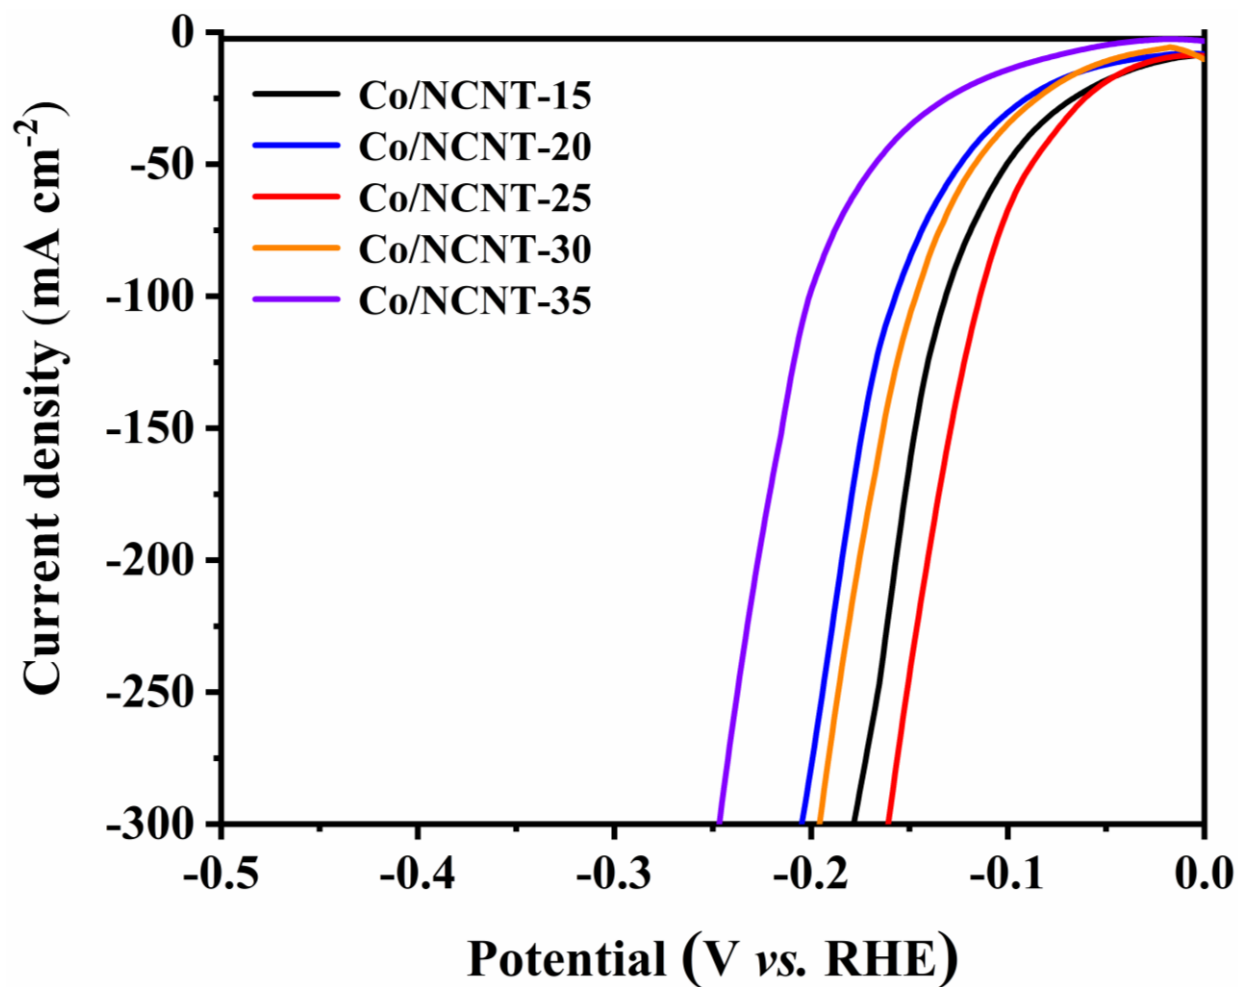

Fig. S7. LSV curves of Co/NCNT samples prepared with different contents in 1M KOH.

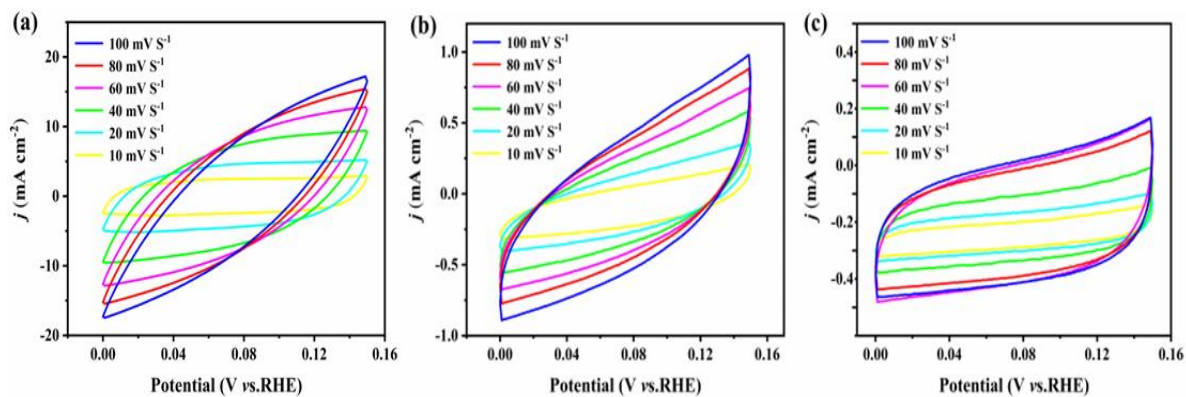

Fig. S8. CVs for (a) Co/NCNT-25, (b) NCNT, and (c) Co/CNT composites at different scan rates.



**Table S1.** Elemental analysis results of Co /NCNT-25 by XPS.

| Samples    | C (at%) | N (at%) | O (at%) | Co (at%) |
|------------|---------|---------|---------|----------|
| Co/NCNT-25 | 91.57   | 2.96    | 4.34    | 1.12     |

**Table S2.** Comparison of electrochemical performances for the obtained Co/NCNT-25 with those of carbon materials.

| Sample                                                 | Electrolyte                        | Overpotential $\eta_{10}$ (mV vs. RHE) | Ref.         |
|--------------------------------------------------------|------------------------------------|----------------------------------------|--------------|
| Co/NCNT-25                                             | 1 M KOH                            | 20                                     | In this work |
| Co/NGC-3                                               | 0.1M KOH                           | 293                                    | [2]          |
| Co@N-CNTs@rGO                                          | 1 M KOH                            | 108                                    | [3]          |
|                                                        | 0.5MH <sub>2</sub> SO <sub>4</sub> | 87                                     |              |
| Mo/Co@N-C                                              | 1M KOH                             | 157                                    | [4]          |
|                                                        | 0.5MH <sub>2</sub> SO <sub>4</sub> | 187                                    |              |
| Mn-N-Co <sub>9</sub> S <sub>8</sub>                    | 1 M KOH                            | 102                                    | [5]          |
| NF@Co <sub>1-x</sub> V <sub>x</sub> P                  | 1 M KOH                            | 46                                     | [6]          |
| Fe <sub>3</sub> C-Co/NC                                | 1 M KOH                            | 238                                    | [7]          |
| Co/N-CNT/VN                                            | 1 M KOH                            | 63.4                                   | [8]          |
| CoSP/NC                                                | 1 M KOH                            | 183                                    | [9]          |
| CoP-NCNT@MoS <sub>2</sub>                              | 1 M KOH                            | 123                                    | [10]         |
| NSP-Co <sub>3</sub> FeN <sub>x</sub>                   | 1 M KOH                            | 23                                     | [11]         |
| Co SAs-Co NPs/NCFs                                     | 1 M KOH                            | 205                                    | [12]         |
|                                                        | 0.5MH <sub>2</sub> SO <sub>4</sub> | 106                                    |              |
| CoNiMn/NC                                              | 1 M KOH                            | 191                                    | [13]         |
| Ru/Co-NCNTs                                            | 1 M KOH                            | 35                                     | [14]         |
| Co-Mo <sub>2</sub> C/N-C                               | 1 M KOH                            | 212                                    | [15]         |
| Co@NSCs                                                | 1 M KOH                            | 266                                    | [16]         |
| Co@BNCNTs                                              | 1 M KOH                            | 187                                    | [17]         |
| Co@Co-N-C                                              | 1 M KOH                            | 178                                    | [18]         |
| CoPt <sub>3</sub> @Co <sub>2</sub> P/Co@NCNT           | 1 M KOH                            | 19                                     | [19]         |
| Mn/Co-NGC                                              | 1 M KOH                            | 116                                    | [20]         |
| Co@NGr                                                 | 1 M KOH                            | 340                                    | [21]         |
| Co-Mo <sub>2</sub> C@NGCS                              | 1 M KOH                            | 161                                    | [22]         |
| Zn <sub>x</sub> Co <sub>1-x</sub> /NC@MoS <sub>2</sub> | 1 M KOH                            | 130                                    | [23]         |
| CoMoP@N,P-C                                            | 1 M KOH                            | 152                                    | [24]         |
| Co/WC@NC                                               | 1 M KOH                            | 158                                    | [25]         |

|                               |                                    |     |      |
|-------------------------------|------------------------------------|-----|------|
|                               | 0.5MH <sub>2</sub> SO <sub>4</sub> | 142 |      |
| FeCoCuP@NC                    | 1 M KOH                            | 80  | [26] |
|                               | 0.5MH <sub>2</sub> SO <sub>4</sub> | 169 |      |
| Co <sub>2</sub> P/CoP@Co@NCNT | 1 M KOH                            | 118 | [27] |
| NG@Co@Zn                      | 1 M KOH                            | 34  | [28] |

**Table S3.** The value of the Co/NCNT-25, NCNT, Co/CNT samples fitted by equivalent circuit components.

| Catalysts                               | R <sub>s</sub> /Ω | R <sub>ct</sub> /Ω | W <sub>R</sub> |
|-----------------------------------------|-------------------|--------------------|----------------|
| EIS date obtained in 0.1 M KOH solution |                   |                    |                |
| Co/NCNT-25                              | 1.157             | 0.7385             | 7.475          |
| NCNT                                    | 1.37              | 247                | 1019           |
| Co/CNT                                  | 1.094             | 1.047              | 2.772          |

## References

- [1] N. Sezer, M. Koç, Oxidative acid treatment of carbon nanotubes, *Surf. Interfaces.*, 2019, **14**, 1-8.
- [2] J. Li, Y. Kang, D. Liu, Z. Lei, P. Liu, Nitrogen-doped graphitic carbon-supported ultrafine Co nanoparticles as an efficient multifunctional electrocatalyst for HER and rechargeable Zn-air batteries, *ACS Appl. Mater. Interfaces.*, 2020, **12**, 5717-5729.
- [3] Z. Chen, R. Wu, Y. Liu, Y. Ha, Y. Guo, D. Sun, M. Liu, F. Fang, Ultrafine Co nanoparticles encapsulated in carbon-nanotubes-grafted graphene sheets as advanced electrocatalysts for the hydrogen evolution reaction, *Adv. Mater.*, 2018, **30**, 1802011.
- [4] C. Wu, D. Liu, H. Li, J. Li, Molybdenum carbide-decorated metallic cobalt@nitrogen-doped carbon polyhedrons for enhanced electrocatalytic hydrogen evolution, *Small.*, 2018, **14**, 1704227.
- [5] Y. Xing, D. Li, L. Li, H. Tong, D. Jiang, W. Shi, Accelerating water dissociation kinetic in Co<sub>9</sub>S<sub>8</sub> electrocatalyst by mn/N Co-doping toward efficient alkaline hydrogen evolution, *Int. J. Hydrogen. Energy.*, 2021, **46**, 7989–8001.
- [6] M. Yang, C. Shang, F. Li, C. Liu, Z. Wang, S. Gu, D. Liu, L. Cao, J. Zhang, Z. Lu, H. Pan, Synergistic electronic and morphological modulation on ternary Co<sub>1-x</sub>V<sub>x</sub>P nanoneedle arrays for hydrogen evolution reaction with large current density, *Sci. China Mater.*, 2020, **64**, 880-891.
- [7] C.C. Yang, S.F. Zai, Y.T. Zhou, L. Du, Q. Jiang, Fe<sub>3</sub>C-Co nanoparticles encapsulated in a hierarchical structure of N-doped carbon as a multifunctional electrocatalyst for ORR, OER, and HER, *Adv. Funct. Mater.*, 2019, **29**, 1901949.

- [8] C. Huang, D. Wu, P. Qin, K. Ding, C. Pi, Q. Rian, H. Song, B. Gao, H. Chen, P.-K. Chu, Ultrafine Co nanodots embedded in N-doped carbon nanotubes grafted on hexagonal VN for highly efficient overall water splitting, *Nano Energy.*, 2020, **73**, 104788.
- [9] L. Zhao, A. Yang, A. Wang, H. Yu, J. Dai, Y. Zheng, Metallic Co, CoS, and P co-doped N enriched carbon derived from ZIF-67 as an efficient catalyst for hydrogen evolution reaction, *Int. J. Hydrogen. Energy.*, 2020, **45**, 30367-30374.
- [10] T. Wang, C. Jia, B. Wang, P. Yang, MoS<sub>2</sub> nanosheets grown vertically on N-doped carbon nanotubes embedded CoP nanoparticles for efficient hydrogen evolution, *J. Alloy. Compd.*, 2020, **813**, 152211.
- [11] Y. Wang, D. Liu, Z. Liu, C. Xie, J. Huo, S. Wang, Porous cobalt–iron nitride nanowires as excellent bifunctional electrocatalysts for overall water splitting, *Chem. Commun.*, 2016, **52**, 12614-12617.
- [12] M. Wang, M. Li, Y. Zhao, N. Shi, H. Zhang, Y. Zhao, Y. Zhang, H. Zhang, W. Wang, K. Sun, Y. Pan, S. Liu, H. Zhu, W. Guo, Y. Li, Y. Liu, C. Liu, Construction of N-doped carbon frames anchored with Co single atoms and Co nanoparticles as robust electrocatalyst for hydrogen evolution in the entire pH range, *J. Energy. Chem.*, 2022, **67**, 147-156.
- [13] B. Jiang, Z. Li, MOF-derived Co, Ni, Mn co-doped N-enriched hollow carbon for efficient hydrogen evolution reaction catalysis, *J. Solid. State. Chem.*, 2021, **295**, 121912.
- [14] B. Yan, D. Liu, X. Feng, M. Shao, Y. Zhang, Ru nanoparticles supported on Co-embedded N-doped carbon nanotubes as efficient electrocatalysts for hydrogen evolution in basic media, *Chem. Res. Chin. Univ.*, 2020, **36**, 425-430.
- [15] X. Wang, S. Chen, P. Zhou, F. Xiao, Q. He, P. He, L. Jia, B. Jia, H. Zhang, H. Liu, K. Pan, Y. Xie, Facile in-situ fabrication of nanocoral-like bimetallic Co-Mo carbide/nitrogen-doped carbon: a highly active and stable electrocatalyst for hydrogen evolution, *J Mater Sci.*, 2021, **56**, 11894-11906.
- [16] H.-M. Zhang, C. Zhu, Co nanoparticles-embedded N, S-codoped hierarchically porous graphene sheets as efficient bifunctional electrocatalysts for oxygen reduction reaction and hydrogen evolution reaction, *J. Mater. Res. Technol.*, 2020, **9**, 16270-16279.
- [17] Z. Yu, K. Yao, S. Zhang, Y. Liu, Y. Sun, W. Huang, N. Hu, Morphological and reactive optimization of g-C<sub>3</sub>N<sub>4</sub> -derived Co, N-codoped carbon nanotubes for hydrogen evolution reaction, *New J. Chem.*, 2021, **45**, 6308-6314.
- [18] Z. Li, X. Dai, Cobalt nanoparticles encapsulated in nitrogen-rich carbonitride nanotubes for efficient and stable hydrogen evolution reaction at all pH values, *Int. J. Hydrogen. Energy.*, 2021, **46**, 26347-26357.

- [19] Z. Lu, J. Xie, J. Hu, K. Wang, Y. Cao, In situ replacement synthesis of Co@NCNT encapsulated CoPt<sub>3</sub>@Co<sub>2</sub>P heterojunction boosting methanol oxidation and hydrogen evolution, *Small.*, 2021,**17**,2104656.
- [20] A. Arshad, S. Yun, J. Shi, M. Sun, N. Zafar, A. Hagfeldt, N-coordinated bimetallic defect-rich nanocarbons as highly efficient electrocatalysts in advanced energy conversion applications, *Chem. Eng. J.*, 2022,**435**, 134913.
- [21] G.R. Bhadu, B. Parmar, P. Patel, J.C. Chaudhari, E. Suresh, Controlled assembly of cobalt embedded N-doped graphene nanosheets (Co@NGr) by pyrolysis of a mixed ligand Co (II) MOF as a sacrificial template for high-performance electrocatalysts, *RSC Adv.*, 2021,**11**, 21179-21188.
- [22] A. Jiang, W. Zhang, Z. Wang, N.P. Nidamanuri, Q. Li, X.C. Zeng, M. Dong, Direct synthesis of bifunctional nanorods from a Co-adenine-MoO<sub>3</sub> hybrid for overall water splitting, *Mater. Chem. Front.*, 2020, **4**, 546-554.
- [23] J. Feng, H. Zhou, D. Chen, T. Bian, A. Yuan, Core-shell structured ZnCo/NC@MoS<sub>2</sub> electrocatalysts for tunable hydrogen evolution reaction, *Electrochim. Acta.*, 2020, **331**, 135445.
- [24] D. Sun, S. Lin, Y. Yu, S. Liu, F. Meng, G. Du, B. Xu, One-pot synthesis of N and P Co-doped carbon layer stabilized cobalt-doped MoP 3D porous structure for enhanced overall water splitting, *J. Alloys. Compd.*, 2022, **895**, 162595.
- [25] Y. Liu, J. Li, D. Sun, L. Men, B. Sun, X. Li, Q. An, F. Liu, Z. Su, Self-assembly of bimetallic polyoxometalates and dicyandiamide to form Co/WC@NC for efficient electrochemical hydrogen generation, *New J. Chem.*, 2022, **46**, 178-184.
- [26] S. Li, Q. Zhang, J. Sun, J. Guan, Favorable role of heterojunction in trimetallic Fe-Co-Cu phosphides on nitrogen-doped carbon materials for hydrogen evolution, *Mater. Today. Energy.*, 2020, **17**, 100464.
- [27] Z. Lu, Y. Cao, J. Xie, J. Hu, K. Wang, D. Jia, Construction of Co<sub>2</sub>P/CoP@Co@NCNT rich-interface to synergistically promote overall water splitting, *Chem. Eng. J.*, 2022, **430**, 132877.
- [28] M. Jiao, Z. Chen, X. Zhang, K. Mou, L. Liu, Multicomponent N doped graphene coating Co@Zn heterostructures electrocatalysts as high efficiency HER electrocatalyst in alkaline electrolyte, *Int. J. Hydrogen. Energy.*, 2020, **45**, 16326-16336.
